# Supplementary material
Source: MDPI journal article supplement (https://www.mdpi.com/1999-4907/10/11/1017)
Supplement: s1 [file s1]

*Supplementary Materials*

## **Strong Disturbance Impact of Tropical Cyclone Lionrock (2016) on Korean Pine-Broadleaved Forest in the Middle Sikhote-Alin Mountain Range, Russian Far East**

Anna S. Vozmishcheva <sup>1,2\*</sup>, Kirill A. Korznikov <sup>1</sup>, Svetlana N. Bondarchuk <sup>3</sup>, Mikhail N. Gromyko <sup>3</sup>, Dmitriy E. Kislov <sup>1</sup>, Elena A. Pimenova <sup>1</sup> and Michail A. Salo <sup>3</sup>

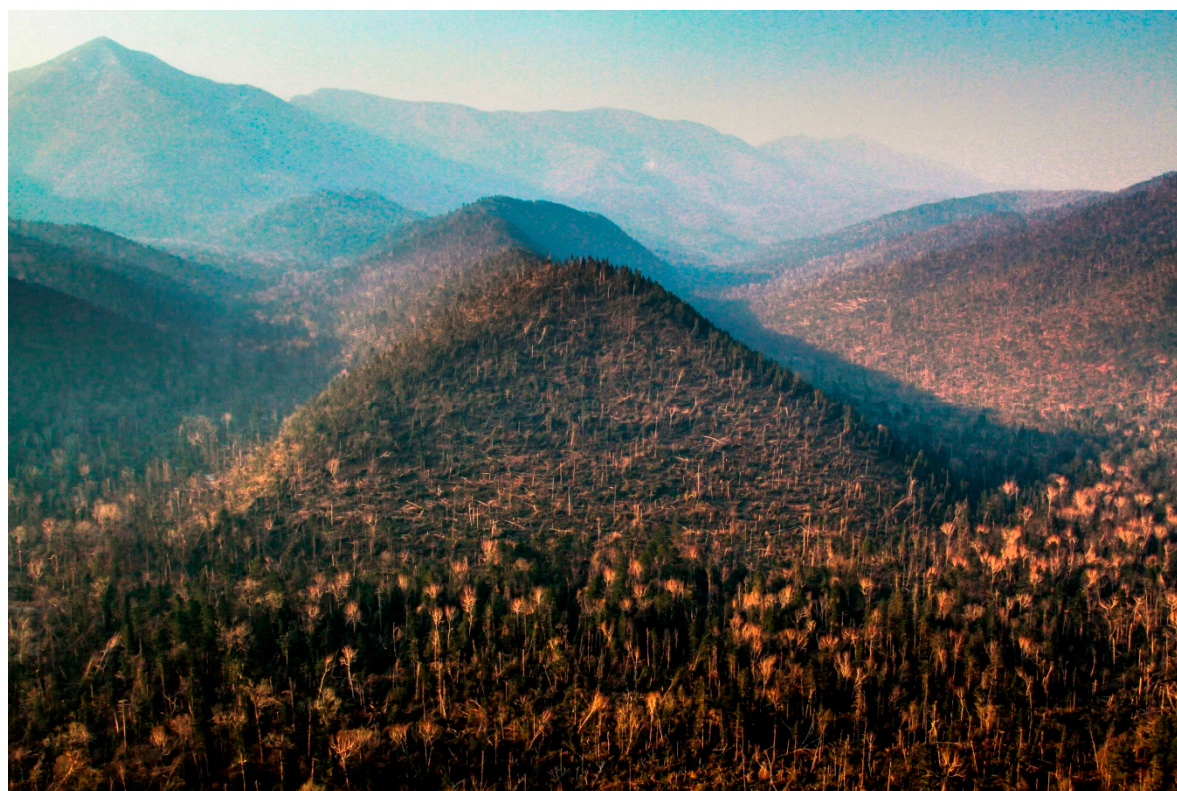

**Figure S1.** Windthrow forest in the Middle Sikhote-Alin Mountain Range, Russian Far East.



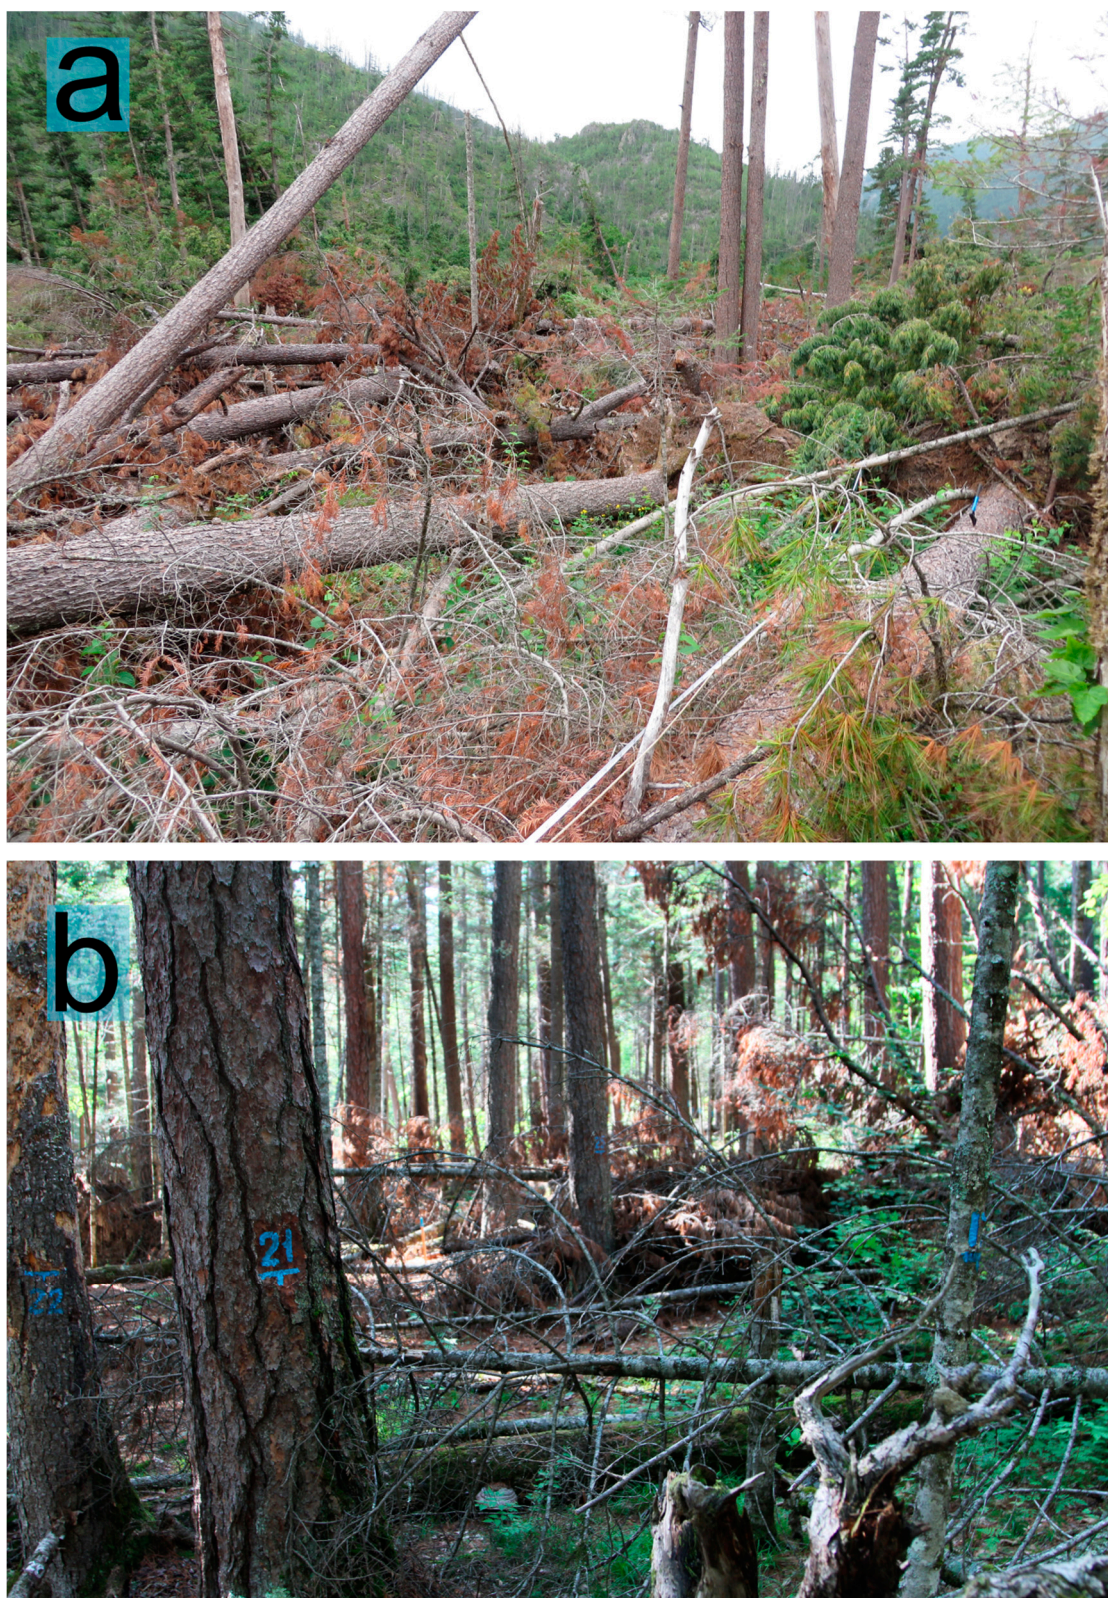

**Figure S2.** The character of wind-caused tree damage at PP1 (a) and PP2 (b).
